# Supplementary material
Source: PubMed Central journal article supplement (PMC4670809)

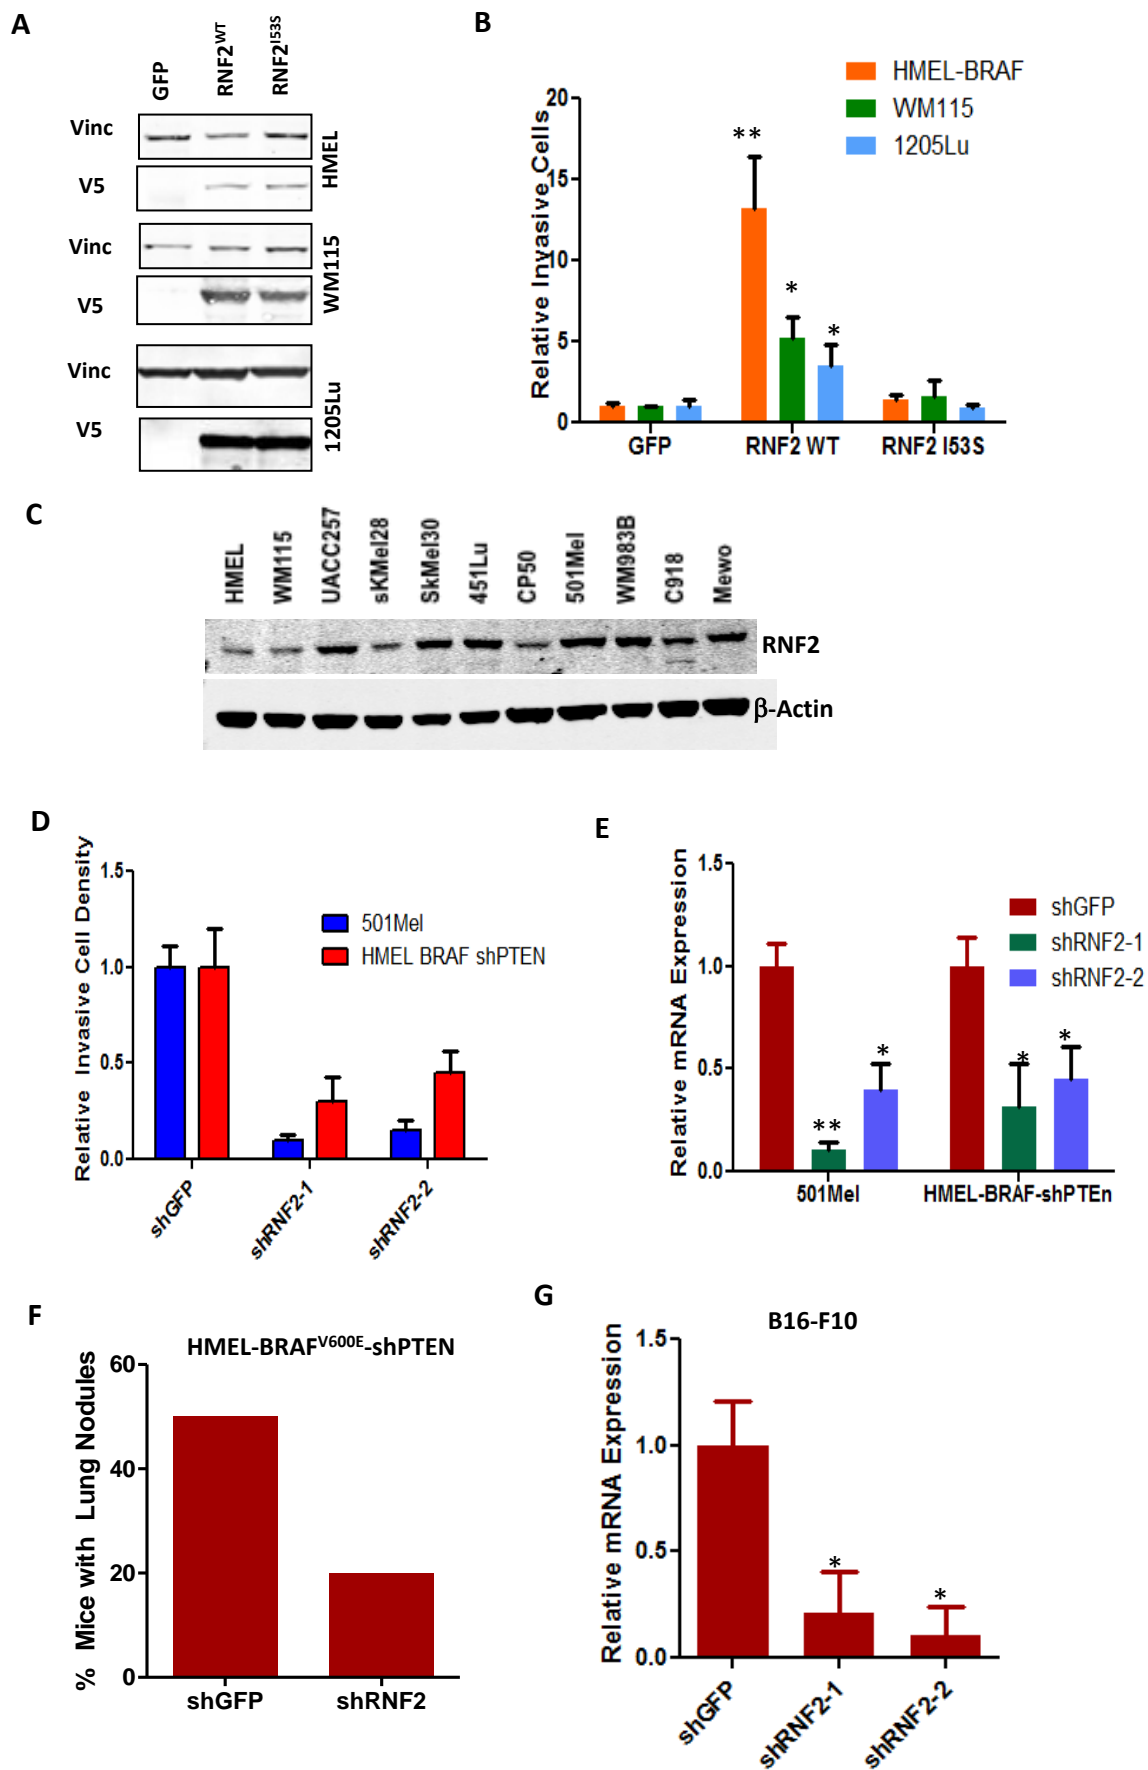

Supplemental Figure 1, Rai et al

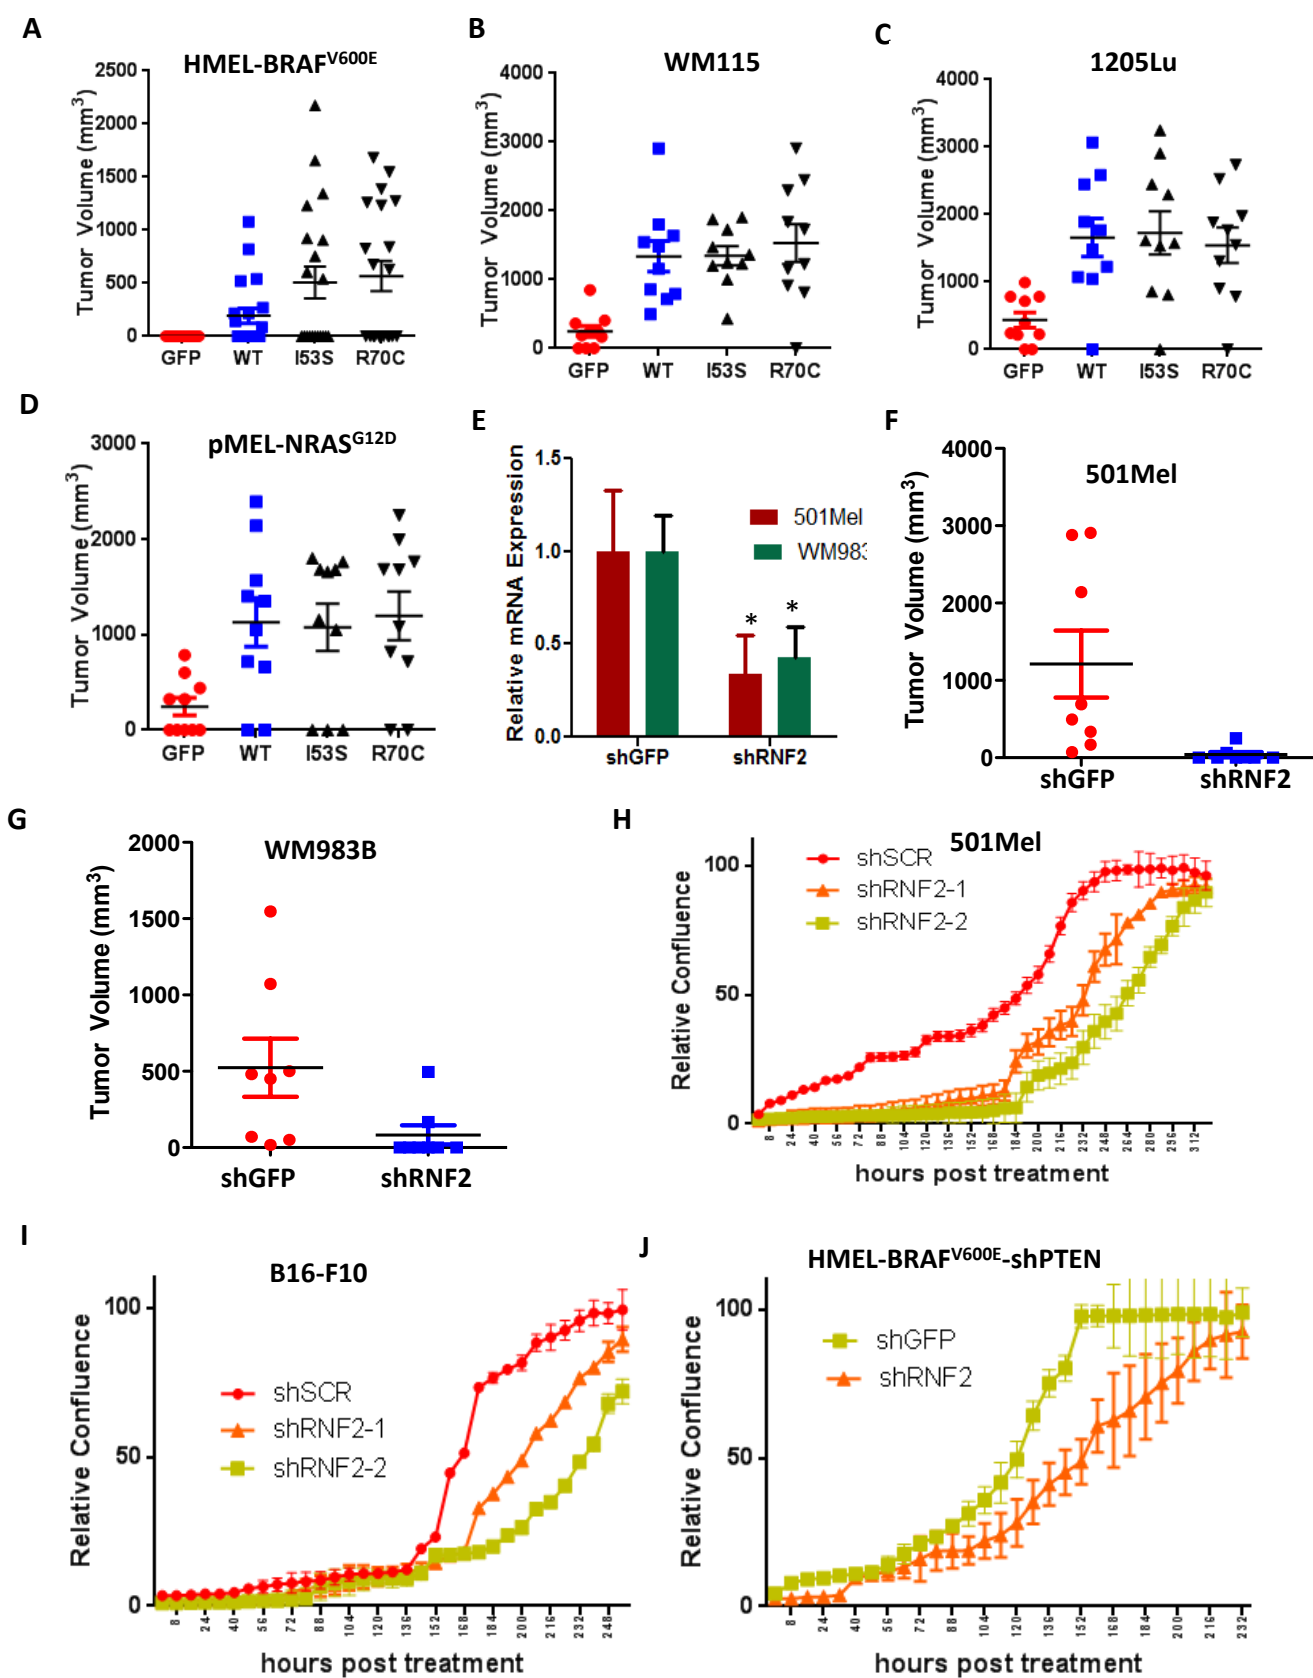

Supplemental Figure 2, Rai et al

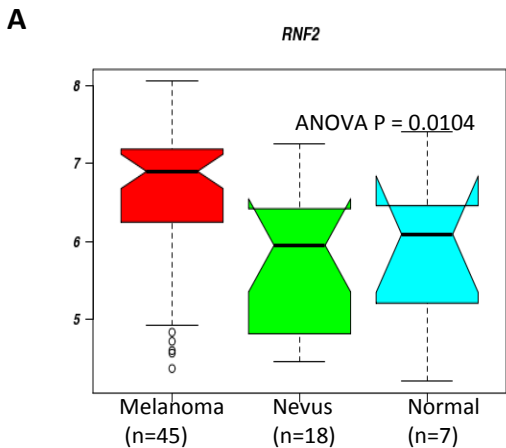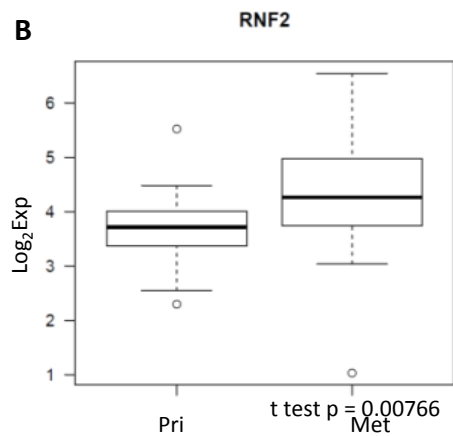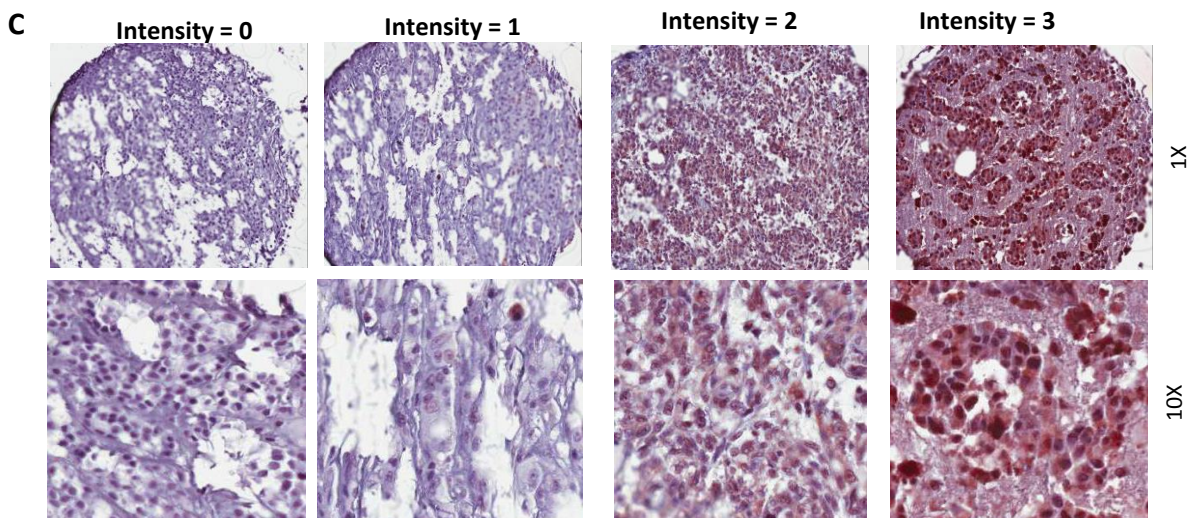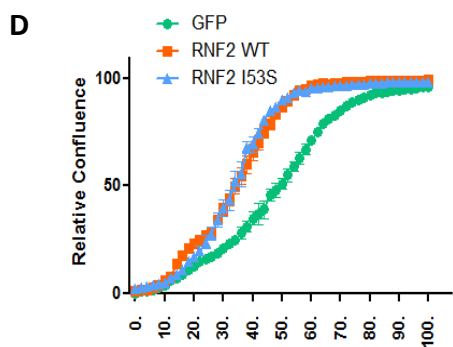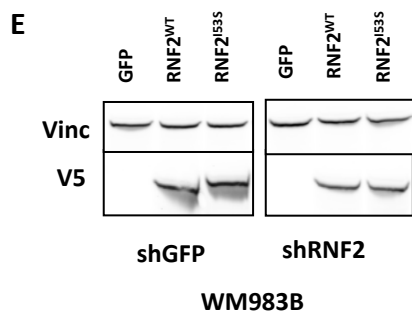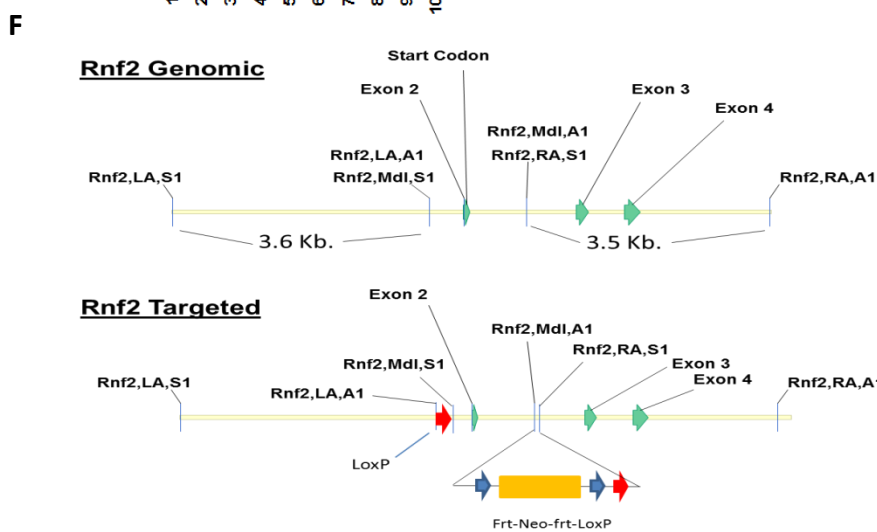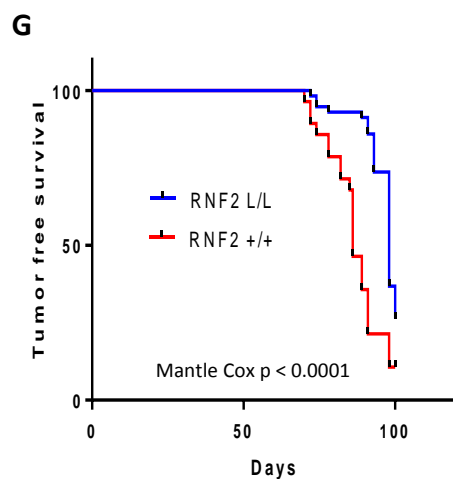

Supplemental Figure 3, Rai et al

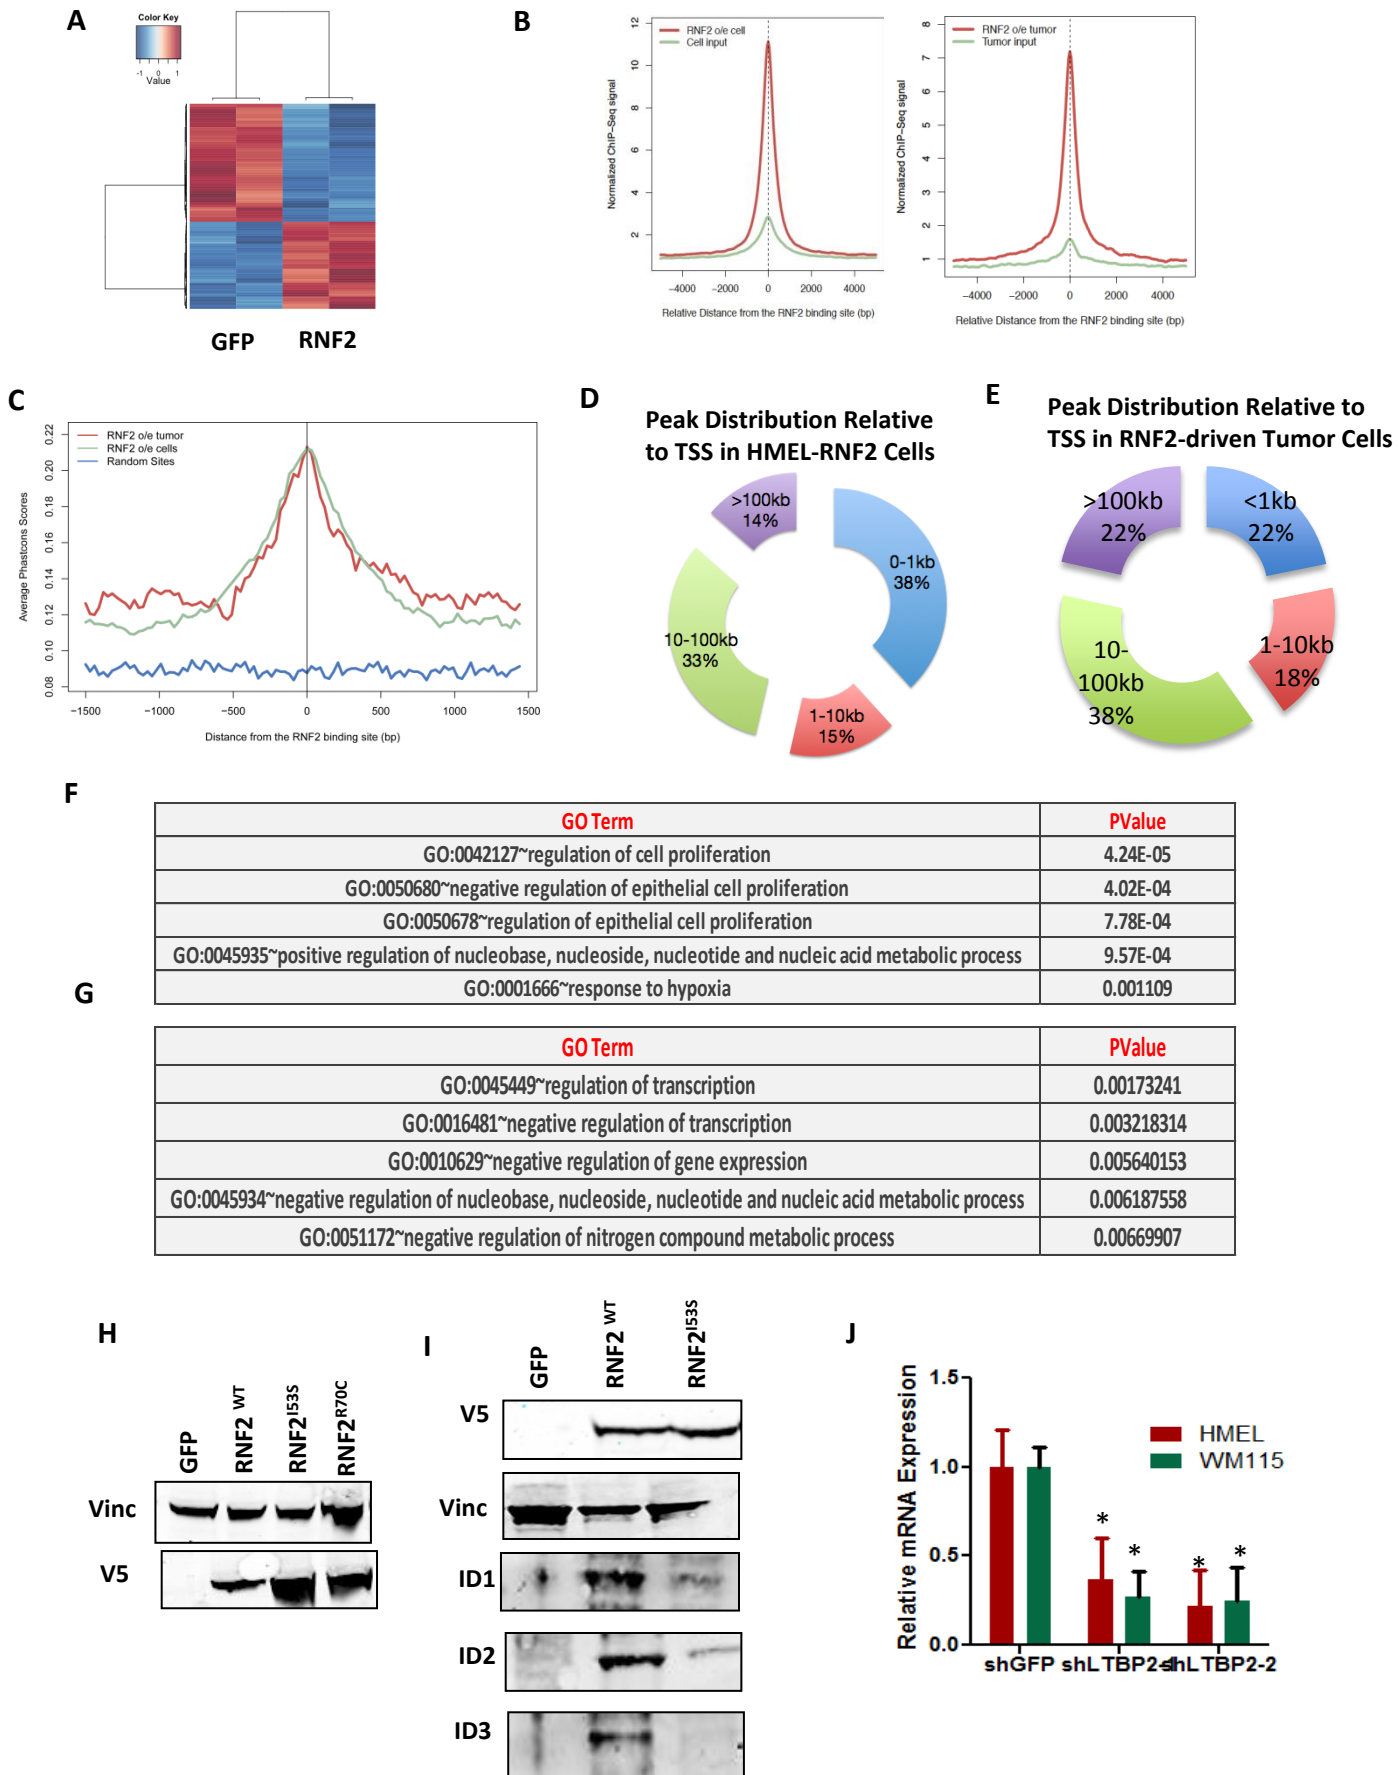

Supplementary Figure 4, Rai et al

**A****HME1-BRAF<sup>V600E</sup> States**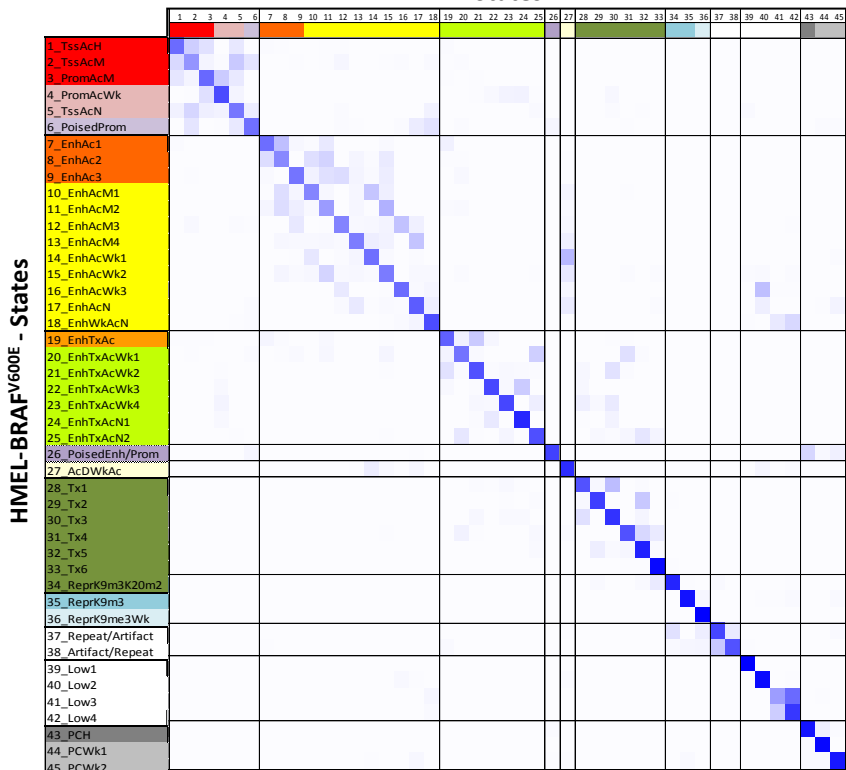**B**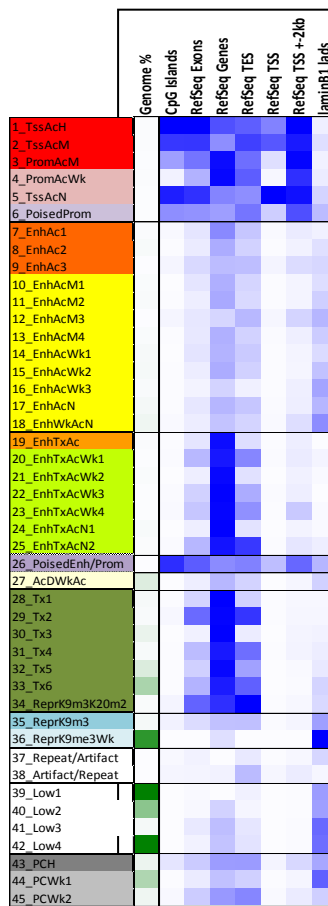

Supplement: NIHMS730247-supplement-2.pdf [file NIHMS730247-supplement-2.pdf]
